# Supplementary material
Source: PubMed Central journal article supplement (PMC1193988)

## Single mutants

This figure shows a superimposition of the wild-type closed form and the final structure obtained from the F214S simulation. The lid residues are highlighted.

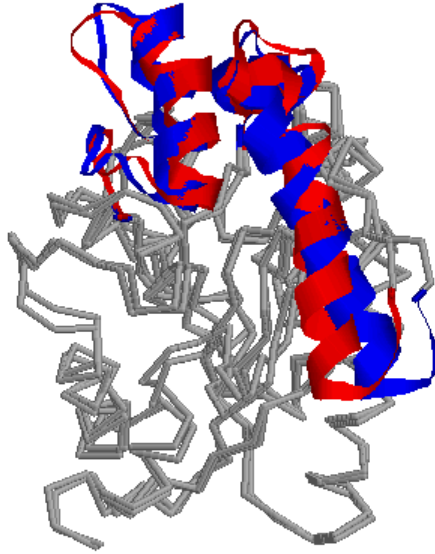

Supplement: pcbi.0010028.sd007.pdf [file pcbi.0010028.sd007.pdf]
