# Supplementary material
Source: PubMed Central journal article supplement (PMC1193988)
Supplement: pcbi.0010028.sd008.pdf [file pcbi.0010028.sd008.pdf]

## Box Sizes

|                         |                              |
|-------------------------|------------------------------|
| <b>Water Box</b>        | <i>5.511 x 4.933 x 4.964</i> |
| <b>Water+Octane box</b> | <i>5.511 x 4.933 x 7.5</i>   |
