# Supplementary material
Source: PubMed Central journal article supplement (PMC1193988)

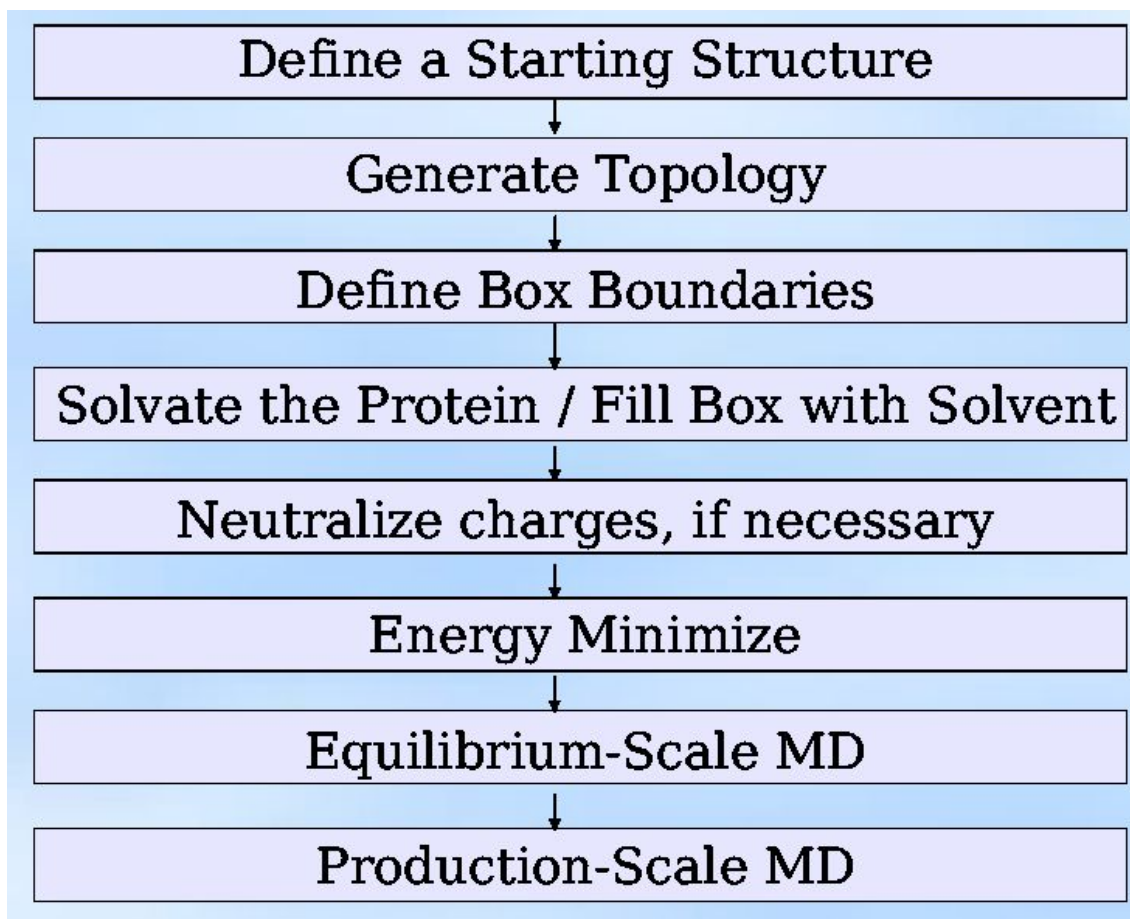

Supplement: pcbi.0010028.sd003.pdf [file pcbi.0010028.sd003.pdf]
